# Supplementary material for: How do students study in STEM courses? Findings from a light-touch intervention and its relevance for underrepresented students
Source: PubMed Central journal article supplement (PMC6067695; doi:10.1371/journal.pone.0200767), 2018-07-31
Supplement: pone.0200767.s004.pdf [file pone.0200767.s004.pdf]

**study**

*(verb)*

The act of texting, eating  
and watching TV with an  
open textbook nearby.

**What** are you doing?

**When** are you doing it?

1

**What are you doing?**

- Discuss with your neighbor:
  - How you have been preparing for the class so far?
  - How do you typically prepare for exams?

2

## What are you doing?

- Discuss with your neighbor:
  - How you have been preparing for the class so far?
  - How do you typically prepare for exams?

3

Rank these studying methods from least useful to most useful in terms of how much you will retain of what you learned

A – reading a textbook

B – answering questions (self-testing)

C – listening to a lecture

D – discussing with your classmates

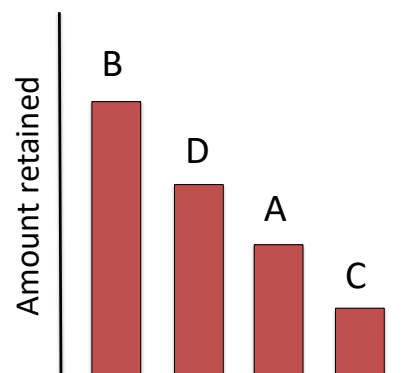

**Self-testing is key!**

4

# The Learning Pyramid\*

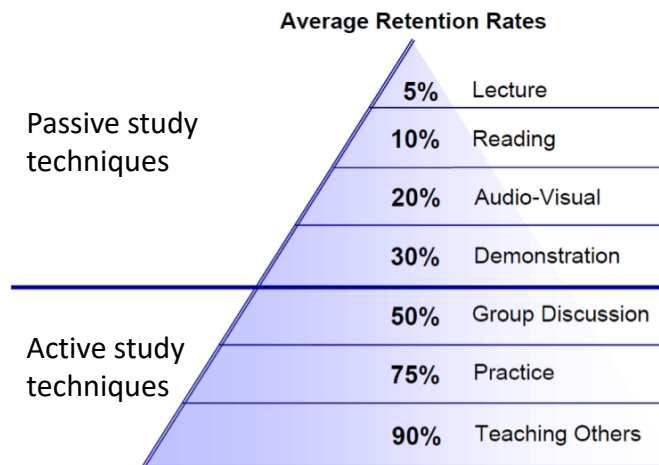

\*Adapted from National Training Laboratories, Bethel, Maine

5

## Effective Self-Testing Techniques

- Answering practice questions
- Recalling course concepts from memory
- Explaining course concepts to classmates (or yourself)
  
- Self-testing reveals what you truly know and what you truly don't

6

## When are you doing it?

- How do you typically prepare for a quiz?

7

## When are you doing it?

### 2016 APRIL

| SUN | MON | TUE           | WED           | THU | FRI | SAT |
|-----|-----|---------------|---------------|-----|-----|-----|
|     |     |               |               |     | 1   | 2   |
| 3   | 4   | 5             | 6<br>HW 1 due | 7   | 8   | 9   |
| 10  | 11  | 12<br>STUDY!! | 13<br>Quiz 1  | 14  | 15  | 16  |

8

When are you doing it?

| 2016 APRIL  |             |             |               |            |     |     |
|-------------|-------------|-------------|---------------|------------|-----|-----|
| SUN         | MON         | TUE         | WED           | THU        | FRI | SAT |
|             |             |             |               |            | 1   | 2   |
| 3<br>Study  | 4<br>Study  | 5<br>Study  | 6<br>HW 1 due | 7<br>Study | 8   | 9   |
| 10<br>Study | 11<br>Study | 12<br>Study | 13<br>Quiz 1  | 14         | 15  | 16  |

When are you doing it?

- **Schedule** your studying
  - Using google calendar, other apps

Send yourself reminders before exams, HW due dates

## Ask yourself:

- Do you utilize self-testing?
- Are you taking an active role in your studying?
- Are you spacing out your studying?

11

## Specific Ways to Practice?

- **In lecture!!!**
- Weekly HW
- Practice Quiz

12
