# Supplementary material for: How do students study in STEM courses? Findings from a light-touch intervention and its relevance for underrepresented students
Source: PubMed Central journal article supplement (PMC6067695; doi:10.1371/journal.pone.0200767), 2018-07-31
Supplement: pone.0200767.s005.pdf [file pone.0200767.s005.pdf]

## Supporting File 2. Pre- and Post-Survey Study Skills Items

Adapted from Morehead, Rhodes, & DeLozier (2016) and Kornell & Bjork (2007)

### *Pre-Survey*

1. Which of the following best describes your study patterns?
  - I most often space out my study sessions over multiple days/weeks
  - I most often do my studying right before the test
2. Select the top 3 study strategies you use most regularly. Please select **ONLY 3**.
  - Test yourself with questions or practice problems
  - Use flashcards
  - Reread chapters, articles, notes, etc.
  - Underlining or highlighting while reading
  - Recopy your notes word-for-word
  - Condensing/Summarizing your notes
  - Recopy your notes from memory
  - Make diagrams, charts, or pictures
  - Study with friends
  - Absorbing lots of information the night before the test
  - Watch/listen to recorded lessons either by instructor or from outside source (Khan Academy, Youtube, etc.).
  - Other
3. When studying, how do you generally decide what class to study for first? (open-ended)

### *Post-Survey*

1. Which of the following best describes your study patterns **for this course**?
  - I most often space out my study sessions over multiple days/weeks
  - I most often do my studying right before the test
2. Select the top 3 study strategies you use most regularly **in this course this quarter**. Please select **ONLY 3**.
  - Test yourself with questions or practice problems
  - Use flashcards
  - Reread chapters, articles, notes, etc.
  - Underlining or highlighting while reading
  - Recopy your notes word-for-word
  - Condensing/Summarizing your notes
  - Recopy your notes from memory
  - Make diagrams, charts, or pictures
  - Study with friends
  - Absorbing lots of information the night before the test
  - Watch/listen to recorded lessons either by instructor or from outside source (Khan Academy, Youtube, etc.).
  - Other
3. When studying, how do you generally decide what class to study for first? (open-ended)
