# Supplementary material for: How do students study in STEM courses? Findings from a light-touch intervention and its relevance for underrepresented students
Source: PubMed Central journal article supplement (PMC6067695; doi:10.1371/journal.pone.0200767), 2018-07-31
Supplement: pone.0200767.s006.pdf [file pone.0200767.s006.pdf]

**Table S1. Post-hoc chi-square analysis of spacing and self-testing categories and course section (Year 1).**

|                                         |                                  | Intervention vs.<br>Control Section 1<br>(n = 335) |                             | Intervention vs.<br>Control Section 2<br>(n = 341) |                             |
|-----------------------------------------|----------------------------------|----------------------------------------------------|-----------------------------|----------------------------------------------------|-----------------------------|
|                                         |                                  | Raw<br><i>p</i> -value                             | Adjusted<br><i>p</i> -value | Raw<br><i>p</i> -value                             | Adjusted<br><i>p</i> -value |
| Spacing Category<br>Comparisons         | Never Used vs. Stopped Using     | 0.009                                              | 0.056                       | 0.071                                              | 0.424                       |
|                                         | Never Used vs. Started Using     | 0.538                                              | 1.000                       | 0.154                                              | 0.922                       |
|                                         | Never Used vs. Maintained Use    | 0.895                                              | 1.000                       | 0.017                                              | 0.101                       |
|                                         | Stopped Using vs. Started Using  | 0.005                                              | 0.032                       | 0.006                                              | 0.038                       |
|                                         | Stopped Using vs. Maintained Use | 0.002                                              | 0.014                       | 0.001                                              | 0.003                       |
|                                         | Started Using vs. Maintained Use | 0.567                                              | 1.000                       | 1.000                                              | 1.000                       |
| Self-Testing<br>Category<br>Comparisons | Never Used vs. Stopped Using     | 1.000                                              | 1.000                       | 0.571                                              | 1.000                       |
|                                         | Never Used vs. Started Using     | 0.000                                              | 0.000                       | 0.001                                              | 0.007                       |
|                                         | Never Used vs. Maintained Use    | 0.000                                              | 0.001                       | 0.008                                              | 0.050                       |
|                                         | Stopped Using vs. Started Using  | 0.000                                              | 0.000                       | 0.000                                              | 0.001                       |
|                                         | Stopped Using vs. Maintained Use | 0.000                                              | 0.001                       | 0.001                                              | 0.004                       |
|                                         | Started Using vs. Maintained Use | 0.226                                              | 1.000                       | 0.183                                              | 1.000                       |

Post-hoc tests were used to examine proportion differences for the different spacing and self-testing categories between the intervention and control courses. *Maintained use* means the student reported using that strategy on both the pre- and post-survey, *started using* means the student only reported using the strategy on the post, *stopped using* means the student only reported using the strategy on the pre, and *never used* means the student did not report using the strategy on either the pre- or post-survey. Note: Ns for each section are the following: Intervention Course = 132, Control Course B = 203, Control Course C = 209.
