# Supplementary material for: How do students study in STEM courses? Findings from a light-touch intervention and its relevance for underrepresented students
Source: PubMed Central journal article supplement (PMC6067695; doi:10.1371/journal.pone.0200767), 2018-07-31
Supplement: pone.0200767.s007.pdf [file pone.0200767.s007.pdf]

**Table S2. Post-hoc chi-square analysis of self-testing categories and course section (Year 2).**

|                                         |                                  | Intervention Course vs.<br>Control Course B<br>(n = 531) |                             | Intervention Course vs.<br>Control Course C<br>(n = 578) |                             |
|-----------------------------------------|----------------------------------|----------------------------------------------------------|-----------------------------|----------------------------------------------------------|-----------------------------|
|                                         |                                  | Raw<br><i>p</i> -value                                   | Adjusted<br><i>p</i> -value | Raw<br><i>p</i> -value                                   | Adjusted<br><i>p</i> -value |
| Self-Testing<br>Category<br>Comparisons | Never Used vs. Stopped Using     | 0.224                                                    | 1.000                       | 0.131                                                    | 0.785                       |
|                                         | Never Used vs. Started Using     | 0.083                                                    | 0.496                       | 0.018                                                    | 0.106                       |
|                                         | Never Used vs. Maintained Use    | 0.005                                                    | 0.027                       | 0.000                                                    | 0.001                       |
|                                         | Stopped Using vs. Started Using  | 0.004                                                    | 0.022                       | 0.000                                                    | 0.002                       |
|                                         | Stopped Using vs. Maintained Use | 0.000                                                    | 0.000                       | 0.000                                                    | 0.000                       |
|                                         | Started Using vs. Maintained Use | 0.766                                                    | 1.000                       | 0.667                                                    | 1.000                       |

Post-hoc tests were used to examine proportion differences for the different self-testing categories between the intervention and control courses. *Maintained use* means the student reported using that strategy on both the pre- and post-survey, *started using* means the student only reported using the strategy on the post, *stopped using* means the student only reported using the strategy on the pre, and *never used* means the student did not report using the strategy on either the pre- or post-survey. Note: Ns for each section are the following: Intervention Course = 327, Control Course B = 204, Control Course C = 251.
